# Supplementary material for: Repurposing approach identifies pitavastatin as a potent azole chemosensitizing agent effective against azole-resistant Candida species
Source: PubMed Central journal article supplement (PMC7200796; doi:10.1038/s41598-020-64571-7), 2020-05-05
Supplement: 41598_2020_64571_MOESM1_ESM.pdf [file 41598_2020_64571_MOESM1_ESM.pdf]

**Repurposing approach identifies pitavastatin as a potent azole chemosensitizing agent effective against azole-resistant *Candida* species**

Hassan E. Eldesouky <sup>1</sup> Ehab A. Salama <sup>1</sup>, Xiaoyan Li <sup>1</sup>, Tony R. Hazbun <sup>2,3</sup>, Abdelrahman S.

Mayhoub <sup>4\*</sup> and Mohamed N. Seleem <sup>1,5\*</sup>

<sup>1</sup>Department of Comparative Pathobiology, College of Veterinary Medicine, Purdue University, West Lafayette, IN 47907, USA

<sup>2</sup>Department of Medicinal Chemistry and Molecular Pharmacology, College of Pharmacy, Purdue University, West Lafayette, Indiana 47907, USA

<sup>3</sup>Bindley Bioscience Center, Purdue University, West Lafayette, Indiana 47906, USA

<sup>4</sup>University of Science and Technology, Nanoscience Program, Zewail City of Science and Technology, October Gardens, 6th of October, Giza 12578, Egypt.

<sup>5</sup>Purdue Institute of Inflammation, Immunology, and Infectious Disease, Purdue University, West Lafayette, IN 47907, USA

\*Correspondence:

[amayhoub@azhar.edu.eg](mailto:amayhoub@azhar.edu.eg)

[mseleem@purdue.edu](mailto:mseleem@purdue.edu)

**Supplementary Table 1.** Percent growth inhibition of antineoplastic, antiparasitic, and topical agents identified from Pharmakon drug library screening, in the presence or absence of fluconazole (FLC) 8 µg/ml.

| Name                   | Indication                     | Percent Growth Inhibition (Mean±Standard deviation) |                  |
|------------------------|--------------------------------|-----------------------------------------------------|------------------|
|                        |                                | Without FLC                                         | Plus FLC 8 µg/ml |
| Amsacrine              | Antineoplastic                 | 2.4±7.9                                             | 89±1.2           |
| Dactinomycin           | Antineoplastic                 | 12.2±5.6                                            | 89±1.01          |
| Mycophenolate mofetil  | Antineoplastic                 | 45.3±1.3                                            | 88.5±1.3         |
| Nocodazole             | Antineoplastic                 | 30.1±0.3                                            | 63.8±1.8         |
| Sodium phenylbutyrate  | Antineoplastic                 | 24.1±1.02                                           | 79.8±1.3         |
| Teniposide             | Antineoplastic                 | 25.7±2                                              | 64.4±5.7         |
| Berberine chloride     | Antineoplastic, Antiarrhythmic | 42.4±1.7                                            | 67.5±6.4         |
| Abamectin              | Antiparasitic                  | 23.1±6.6                                            | 67.5±2.3         |
| Dichlorophen           | Antiparasitic                  | 48.9±3.1                                            | 89±1.3           |
| Diminazene aceturate   | Antiparasitic                  | 2.8±3.9                                             | 88.8±1.3         |
| Doramectin             | Antiparasitic                  | 17±8.2                                              | 86.4±0.9         |
| Eprinomectin           | Antiparasitic                  | 25.1±8.1                                            | 83.4±0.15        |
| Homidium bromide       | Antiparasitic                  | 39.7±1.2                                            | 88.5±1.3         |
| Ivermectin             | Antiparasitic                  | 48.4±4                                              | 88.3±1.9         |
| Moxidectin             | Antiparasitic                  | 33±3.6                                              | 68±2.1           |
| Tepoxalin              | Antipsoriatic                  | 44±0.4                                              | 89±0.7           |
| Piroctone olamine      | Antiseborrheic                 | 30.8±1.1                                            | 89.1±0.1         |
| Bithionate sodium      | Antiseptic                     | 50.2±0.12                                           | 89±1.26          |
| Hexylresorcinol        | Antiseptic                     | 49.2±0.6                                            | 87.5±0.8         |
| Mupirocin              | Topical antibacterial          | 45.5±3.6                                            | 82.9±1.9         |
| Pregnenolone succinate | Topical anti-inflammatory      | 6.5±4.9                                             | 70.8±2.3         |
| Bufexamac              | Topical anti-inflammatory      | 5±1.1                                               | 88±1.2           |
| Prednicarbate          | Topical anti-inflammatory      | 27.5±4.6                                            | 89.1±1.2         |

**Supplementary Table 2. Effect of the pitavastatin-voriconazole (VRC) combination against different *Candida* strains.**

| Fungal Strain                               | MIC ( $\mu\text{g/ml}$ ) |          |              |          | $\Sigma\text{FICI}^1$ | Interaction |
|---------------------------------------------|--------------------------|----------|--------------|----------|-----------------------|-------------|
|                                             | VRC                      |          | Pitavastatin |          |                       |             |
|                                             | Alone                    | Combined | Alone        | Combined |                       |             |
| <i>C. albicans</i> SC5314                   | 0.031                    | 0.0078   | 4            | 0.5      | 0.38                  | SYN         |
| <i>C. albicans</i> NR-29448                 | 2                        | 0.0312   | 8            | 2        | 0.27                  | SYN         |
| <i>C. albicans</i> NR-29437                 | 0.125                    | 0.015    | 8            | 1        | 0.25                  | SYN         |
| <i>C. albicans</i> ATCC 26790               | 0.125                    | 0.015    | 8            | 1        | 0.25                  | SYN         |
| <i>C. albicans</i> ATCC MYA 573             | 0.25                     | 0.06     | 16           | 1        | 0.30                  | SYN         |
| <i>C. albicans</i> TWO7241                  | 0.125                    | 0.06     | 8            | 1        | 0.61                  | ADD         |
| <i>C. albicans</i> TWO7243                  | 0.5                      | 0.06     | 64           | 2        | 0.15                  | SYN         |
| <i>C. albicans</i> SC-TAC1 <sup>G980E</sup> | 0.062                    | 0.015    | 32           | 8        | 0.50                  | SYN         |
| <i>C. albicans</i> SC-MRR1 <sup>P983S</sup> | 0.015                    | 0.015    | 8            | 2        | 1.25                  | IND         |
| <i>C. glabrata</i> ATCC 66032               | 0.125                    | 0.015    | 64           | 16       | 0.37                  | SYN         |
| <i>C. glabrata</i> ATCC MYA-2950            | 0.125                    | 0.032    | 64           | 8        | 0.38                  | SYN         |
| <i>C. glabrata</i> ATCC 2001                | 0.062                    | 0.0078   | 64           | 16       | 0.38                  | SYN         |
| <i>C. glabrata</i> HM-1123                  | 0.25                     | 0.062    | 64           | 16       | 0.50                  | SYN         |
| <i>C. auris</i> 385                         | 2                        | 0.5      | 128          | 32       | 0.50                  | SYN         |
| <i>C. auris</i> 386                         | 1                        | 0.25     | 128          | 16       | 0.38                  | SYN         |
| <i>C. auris</i> 388                         | 1                        | 0.125    | 64           | 16       | 0.38                  | SYN         |
| <i>C. auris</i> 389                         | 2                        | 0.5      | 64           | 16       | 0.50                  | SYN         |
| <i>C. auris</i> 390                         | 0.5                      | 0.125    | 64           | 8        | 0.38                  | SYN         |

<sup>1</sup>  $\Sigma\text{FICI}$  (fractional inhibitory concentration index) is used to measure the interaction between the tested combinations.  $\Sigma\text{FICI}$  interpretation corresponded to the following definitions: synergism (SYN),  $\Sigma\text{FICI} \leq 0.5$ ; additivity (ADD),  $\Sigma\text{FICI} > 0.5$  and  $\geq 1$ ; and indifference (IND),  $\Sigma\text{FICI} > 1$  and  $\leq 4$ .

**Supplementary Table 3. Effect of the pitavastatin-itraconazole (ITC) combination against different *Candida* strains.**

| Fungal Strains                              | MIC ( $\mu\text{g/ml}$ ) |          |              |          | $\Sigma\text{FICI}^1$ | Interaction |
|---------------------------------------------|--------------------------|----------|--------------|----------|-----------------------|-------------|
|                                             | ITC                      |          | Pitavastatin |          |                       |             |
|                                             | Alone                    | Combined | Alone        | Combined |                       |             |
| <i>C. albicans</i> SC5314                   | 0.125                    | 0.125    | 4            | 1        | 1.25                  | IND         |
| <i>C. albicans</i> NR-29448                 | 4                        | 0.062    | 8            | 0.25     | 0.05                  | SYN         |
| <i>C. albicans</i> NR-29437                 | 0.5                      | 0.031    | 8            | 0.25     | 0.09                  | SYN         |
| <i>C. albicans</i> ATCC 26790               | 0.25                     | 0.062    | 8            | 0.25     | 0.28                  | SYN         |
| <i>C. albicans</i> ATCC MYA 573             | 0.5                      | 0.25     | 16           | 4        | 0.75                  | ADD         |
| <i>C. albicans</i> TWO7241                  | 0.5                      | 0.25     | 8            | 1        | 0.63                  | ADD         |
| <i>C. albicans</i> TWO7243                  | 1                        | 1        | 64           | 2        | 1.03                  | IND         |
| <i>C. albicans</i> SC-TAC1 <sup>G980E</sup> | 0.5                      | 0.5      | 32           | 0.5      | 1.02                  | IND         |
| <i>C. albicans</i> SC-MRR1 <sup>P983S</sup> | 0.125                    | 0.125    | 8            | 2        | 1.25                  | IND         |
| <i>C. glabrata</i> ATCC 66032               | 0.5                      | 0.25     | 64           | 2        | 0.53                  | ADD         |
| <i>C. glabrata</i> ATCC MYA-2950            | 0.5                      | 0.25     | 64           | 2        | 0.53                  | ADD         |
| <i>C. glabrata</i> ATCC 2001                | 0.5                      | 0.125    | 64           | 2        | 0.28                  | SYN         |
| <i>C. glabrata</i> HM-1123                  | 0.5                      | 0.25     | 64           | 2        | 0.53                  | ADD         |
| <i>C. auris</i> 385                         | 1                        | 0.25     | 128          | 16       | 0.38                  | SYN         |
| <i>C. auris</i> 386                         | 0.5                      | 0.125    | 128          | 16       | 0.38                  | SYN         |
| <i>C. auris</i> 388                         | 1                        | 0.25     | 64           | 16       | 0.50                  | SYN         |
| <i>C. auris</i> 389                         | 1                        | 0.25     | 64           | 8        | 0.38                  | SYN         |
| <i>C. auris</i> 390                         | 1                        | 0.062    | 64           | 16       | 0.31                  | SYN         |

<sup>1</sup>  $\Sigma\text{FICI}$  (fractional inhibitory concentration index) is used to measure the interaction between the tested combinations.  $\Sigma\text{FICI}$  interpretation corresponded to the following definitions: synergism (SYN),  $\Sigma\text{FICI} \leq 0.5$ ; additivity (ADD),  $\Sigma\text{FICI} > 0.5$  and  $\geq 1$ ; and indifference (IND),  $\Sigma\text{FICI} > 1$  and  $\leq 4$ .

**Supplementary Table 4: Source and description of *Candida* strains used in this study**

| Fungal Strain                               | Source                                                       | Description                                                                                                                                 |
|---------------------------------------------|--------------------------------------------------------------|---------------------------------------------------------------------------------------------------------------------------------------------|
| <i>C. albicans</i> SC5314                   | ATCC                                                         | Wild-type strain                                                                                                                            |
| <i>C. albicans</i> NR-29448                 | BEI-Resources                                                | Fluconazole-resistant bloodstream isolate (Arizona, USA)                                                                                    |
| <i>C. albicans</i> NR-29437                 | BEI-Resources                                                | Fluconazole-resistant bloodstream isolate (China)                                                                                           |
| <i>C. albicans</i> ATCC 26790               | ATCC                                                         | Fluconazole-resistant strain isolated from a patient with pulmonary candidiasis                                                             |
| <i>C. albicans</i> ATCC MYA-573             | ATCC                                                         | Fluconazole-resistant bloodstream isolate (from an AIDS patient in Germany)                                                                 |
| <i>C. albicans</i> TWO7241                  | Professor Theodor White (University of Missouri-Kansas City) | Fluconazole-resistant clinical isolate that exhibit increased mRNA levels of <i>MDR1</i> and <i>ERG11</i>                                   |
| <i>C. albicans</i> TWO7243                  |                                                              | Fluconazole- and itraconazole-resistant clinical isolate that exhibit increased mRNA levels of <i>CDR1</i> , <i>MDR1</i> , and <i>ERG11</i> |
| <i>C. albicans</i> SC-TAC1 <sup>G980E</sup> | Professor David Rogers (University of Tennessee).            | A mutant strain with a gain-of-function homozygous mutation in <i>TAC1</i>                                                                  |
| <i>C. albicans</i> SC-MRR1 <sup>P983S</sup> |                                                              | A mutant strain with a gain-of-function homozygous mutation in <i>MRR1</i>                                                                  |
| <i>C. glabrata</i> ATCC 66032               | ATCC                                                         | Not available                                                                                                                               |
| <i>C. glabrata</i> ATCC MYA-2950            | ATCC                                                         | Not available                                                                                                                               |
| <i>C. glabrata</i> ATCC 2001                | ATCC                                                         | A clinical isolate from human intestinal fluid                                                                                              |
| <i>C. glabrata</i> HM-1123                  | BEI-Resources                                                | A clinical isolate from the bronchi of a human patient (Missouri, USA)                                                                      |
| <i>C. auris</i> 385                         | CDC                                                          | Resistant to fluconazole, itraconazole, voriconazole, and amphotericin B                                                                    |
| <i>C. auris</i> 386                         | CDC                                                          | Resistant to fluconazole, voriconazole, and amphotericin B                                                                                  |
| <i>C. auris</i> 388                         | CDC                                                          | Resistant to fluconazole, itraconazole, voriconazole, and amphotericin B                                                                    |
| <i>C. auris</i> 389                         | CDC                                                          | Resistant to fluconazole, itraconazole, voriconazole, and amphotericin B                                                                    |
| <i>C. auris</i> 390                         | CDC                                                          | Resistant to fluconazole, itraconazole, and amphotericin B                                                                                  |

## *C. albicans* SC-TAC1G980E

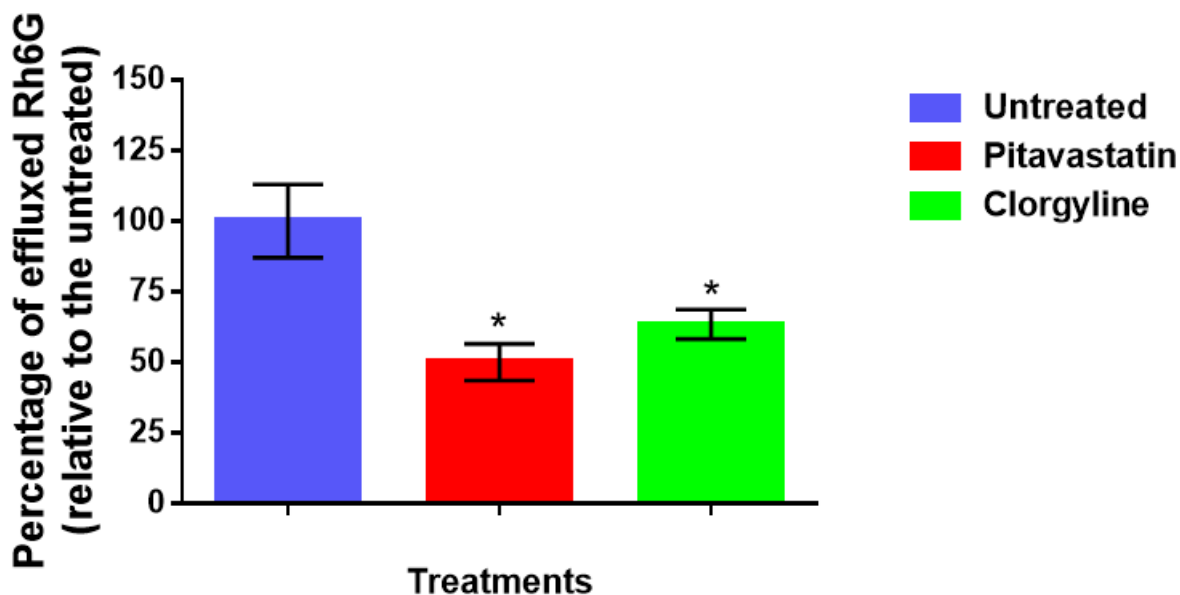

**Supplementary Figure 1: Effect of Pitavastatin on the rhodamine 6G (Rh6G) efflux.** Energy-dependent efflux of rhodamine 6G from the ABC efflux-activated strain SC-TAC1<sup>G980E</sup>. Deenergized cells were preloaded with rhodamine 6G, treated with pitavastatin (0.25 x MIC), or the positive control clorgyline (5 µg/ml), and the efflux of rhodamine was determined by direct measurement of the fluorescence in cell supernatants, following the addition of glucose (10 mM). The relative changes in the effluxed rhodamine as compared to the untreated control were determined. Data represent the means and standard deviations of triplicate determinations. \* indicates a significant difference between each treatment compared to the untreated control ( $P < 0.05$ ) as determined by one-way ANOVA with posthoc Dunnet's test for multiple comparisons.
